# Supplementary material for: Re-designing ferritin nanocages for mercuric ion detection
Source: Royal Society of Chemistry journal article supplement (doi:10.1039/c9an01110b), 2019-01-01
Supplement: c9an01110b1.pdf [file c9an01110b1.pdf]

**Supporting Information**

**for**

**Re-designing Ferritin Nanocage for Mercuric Ion Detection**

Yingjie Wang, Hai Chen, Jiachen Zang, Xiuqing Zhang\*, Guanghua Zhao\*

Beijing Advanced Innovation Center for Food Nutrition and Human Health, College of Food Science and Nutritional Engineering, China Agricultural University, Beijing Key Laboratory of Functional Food from Plant Resources, Beijing, 100083, China.

\*E-mail: [xiuqingzhang@cau.edu.cn](mailto:xiuqingzhang@cau.edu.cn); [gzhao@cau.edu.cn](mailto:gzhao@cau.edu.cn)

```

      10      20      30      40      50      60      70      80      90
HuHF-MBP  .....|.....|.....|.....|.....|.....|.....|.....|.....|
            AGAAGGAGATATACATCTGATGGGCATGACCTGTGCCCGCTGTACGACCCGGTCCACCTCGCAGGTGCGCCAGAACTACCACCAGGACTC
HuHF      .....|.....|.....|.....|.....|.....|.....|.....|.....|
            .....|.....|.....|.....|.....|.....|.....|.....|.....|
            M G M T C A A C T T A S T S Q V R Q N Y H Q D S
            .....|.....|.....|.....|.....|.....|.....|.....|.....|
            M T T A S T S Q V R Q N Y H Q D S

      100     110     120     130     140     150     160     170     180
HuHF-MBP  .....|.....|.....|.....|.....|.....|.....|.....|.....|
            AGAGGCCGCAATCAACCGCCAGATCAACCTGGAGCTCTACGCCCTCCACGTTTACCTGTCCATGTCTTACTACTTTGACCGCATGATGT
HuHF      .....|.....|.....|.....|.....|.....|.....|.....|.....|
            AGAGGCCGCAATCAACCGCCAGATCAACCTGGAGCTCTACGCCCTCCACGTTTACCTGTCCATGTCTTACTACTTTGACCGCATGATGT
            E A A I N R Q I N L E L Y A S Y V Y L S M S Y Y F D R D D V

      190     200     210     220     230     240     250     260     270
HuHF-MBP  .....|.....|.....|.....|.....|.....|.....|.....|.....|
            GGCTTTGAAGAACTTTGCCAAATACCTTCTCACCAATCTCATGAGGAGAGGGAAACATGCTGAGAAACTGATGAAGCTGCAGAACCAACG
HuHF      .....|.....|.....|.....|.....|.....|.....|.....|.....|
            GGCTTTGAAGAACTTTGCCAAATACCTTCTCACCAATCTCATGAGGAGAGGGAAACATGCTGAGAAACTGATGAAGCTGCAGAACCAACG
            A L K N F A K Y F L H Q S H E E R E H A E K L M K L Q N Q R

      280     290     300     310     320     330     340     350     360
HuHF-MBP  .....|.....|.....|.....|.....|.....|.....|.....|.....|
            AGGTGGCCGAATCTTCCTCAGGATATCAAGAAACCCAGACTGTGATGACTGGGAGAGCGGGCTGAATGCAATGGAGTGTGCATTACATTT
HuHF      .....|.....|.....|.....|.....|.....|.....|.....|.....|
            AGGTGGCCGAATCTTCCTCAGGATATCAAGAAACCCAGACTGTGATGACTGGGAGAGCGGGCTGAATGCAATGGAGTGTGCATTACATTT
            G G R I F L Q D I K K P D C D D W E S G L N A M E C A L H L

      370     380     390     400     410     420     430     440     450
HuHF-MBP  .....|.....|.....|.....|.....|.....|.....|.....|.....|
            GGAAAAAATGTGAATCAGTCACCTACTGGAACCTGCACAAACTGGCCACTGACAAAAATGACCCCAATTTGTGTGACTTCATTGAGACACA
HuHF      .....|.....|.....|.....|.....|.....|.....|.....|.....|
            GGAAAAAATGTGAATCAGTCACCTACTGGAACCTGCACAAACTGGCCACTGACAAAAATGACCCCAATTTGTGTGACTTCATTGAGACACA
            E K N V N Q S L L E L H K L A T D K N D P H L C D F I E T H

      460     470     480     490     500     510     520     530     540
HuHF-MBP  .....|.....|.....|.....|.....|.....|.....|.....|.....|
            TTACCTGAATGAGCAGGTGAAAGCCATCAAAGAAATGGGGTGACCACGTGACCAACTTGCGCAAGATGGGAGCGCCGAACTGGCTTGGC
HuHF      .....|.....|.....|.....|.....|.....|.....|.....|.....|
            TTACCTGAATGAGCAGGTGAAAGCCATCAAAGAAATGGGGTGACCACGTGACCAACTTGCGCAAGATGGGAGCGCCGAACTGGCTTGGC
            Y L N E Q V K A I K E L G D H V T N L R K M G A P E S G L A

      550     560     570     580     590     600     610     620     630
HuHF-MBP  .....|.....|.....|.....|.....|.....|.....|.....|.....|
            GGAATATCTCTTTGACAAGCACACCCCTGGGAGACAGTGATAATGAAAGCTAAGGATCCGGCTGCTAACAAAGCCCGAAAGGAAGCTGAGT
HuHF      .....|.....|.....|.....|.....|.....|.....|.....|.....|
            GGAATATCTCTTTGACAAGCACACCCCTGGGAGACAGTGATAATGAAAGCTAAGGATCCGGCTGCTAACAAAGCCCGAAAGGAAGCTGAGT
            E Y L F D K H T L G D S D N E S * G S G C * Q S P K G S * V
            E Y L F D K H T L G D S D N E S *

```

**Figure S1.** Complete nucleotide sequences of HuHF-MBP and HuHF. The chain of hybrid gene were prepared by grafting a mercury binding peptide gene, grafted extra codons are highted within a red box.

**Table S1. Crystallographic properties and data collection and model refinement statistics.**

| Parameters                     | HuHF-MBP                                                |
|--------------------------------|---------------------------------------------------------|
| X-ray source                   | Shanghai Synchrotron Radiation Facility<br>SSRF (BL19U) |
| Wavelength (Å)                 | 0.9789                                                  |
| Space group                    | P42                                                     |
| Resolution range (Å)           | 47.75 - 3.503<br>(3.628 - 3.503)                        |
| Unit cell                      | 217.524, 217.524, 146.821, 90, 90, 90                   |
| Unique reflections             | 85322 (8499)                                            |
| Completeness (%)               | 98                                                      |
| Mean I/sigma (I)               | 1.5                                                     |
| Wilson B-factor                | 46.27                                                   |
| CC1/2                          | 0.945                                                   |
| Reflections used in refinement | 84692(8479)                                             |
| Reflections used for R-free    | 1997 (198)                                              |
| R-work                         | 0.3397 (0.3697)                                         |
| R-free                         | 0.3967 (0.4561)                                         |
| Number of non-hydrogen atoms   | 33912                                                   |
| macromolecules                 | 33912                                                   |
| Protein residues               | 4128                                                    |
| RMS (bonds)                    | 0.003                                                   |
| RMS (angles)                   | 0.50                                                    |
| Ramachandran favored (%)       | 98                                                      |
| Ramachandran allowed (%)       | 1.9                                                     |
| Ramachandran outliers (%)      | 0.44                                                    |
| Rotamer outliers (%)           | 1.2                                                     |
| Clashscore                     | 5.32                                                    |
| Average B-factor               | 34.03                                                   |
| macromolecules                 | 34.03                                                   |
